# Supplementary material for: Multiple molecular mechanisms form a positive feedback loop driving amyloid β42 peptide-induced neurotoxicity via activation of the TRPM2 channel in hippocampal neurons
Source: PubMed Central journal article supplement (PMC5833848; doi:10.1038/s41419-018-0270-1), 2018-02-07

## Supplementary data for the manuscript by Li and Jiang

**Fig. 1 A $\beta$ <sub>42</sub> induces TRPM2-dependent hippocampal neuronal death.** (a) Representative images showing PI staining of wild-type (WT) and TRPM2-KO neurons under control (CTL) conditions or after exposure to 100 ng/ml  $\mu$ M A $\beta$ <sub>42</sub> for 24, 48 and 96 hr. Each panel consists of brightfield image showing neurons, PI staining image (red) showing dead neurons, and merged Hoechst (blue)/PI staining image showing all and dead neurons. Scale bar is 100  $\mu$ m. (b, c) Summary of the mean percentage of PI positive neurons under indicated conditions from 3 independent experiments, with each experiment examining 300-450 neurons. Black and grey bars represent the percentage of neuronal death in WT and TRPM2-KO neurons, respectively. \*\*\*,  $p < 0.005$  indicates significant difference from respective CTL. †††,  $p < 0.005$  indicates significant difference between WT and TRPM2-KO neurons.

**Fig. 2 A $\beta$ <sub>42</sub> but not A $\beta$ <sub>42-1</sub> induces hippocampal neuronal death.** Representative images showing PI staining of wild-type (WT) neurons under control (CTL) conditions or after exposure to 1  $\mu$ M A $\beta$ <sub>42</sub> or A $\beta$ <sub>42-1</sub> for 96 hr. Each panel consists of brightfield image showing neurons, PI staining image (red) showing dead neurons, and merged Hoechst (blue)/PI staining image showing all and dead neurons. Scale bar is 100  $\mu$ m. The mean data is shown in Fig. 1c.

**Fig. 3 PARP-1 inhibitors attenuates A $\beta$ <sub>42</sub>-induced hippocampal neuronal death.** (a) Representative images showing PI staining of wild-type hippocampal neurons treated with 1  $\mu$ M PJ34 or 30  $\mu$ M DPQ, 30 min prior to and during exposure to 1  $\mu$ M A $\beta$ <sub>42</sub> for 96 hr. Each panel consists of brightfield image showing neurons, PI staining images showing dead neurons, and merged images showing Hoechst/PI staining for all and dead neurons. Scale bar is 100  $\mu$ m. (b) Summary of the mean percentage of PI positive neurons from 3-4 independent experiments, with each experiment examining 350-450 neurons. \*\*\*,  $p < 0.005$  indicates significant difference from control (CTL) or untreated neurons. †,  $p < 0.05$  indicates difference from neurons exposed with A $\beta$ <sub>42</sub> alone.

**Fig. 4 Lysosomal localization of Zn<sup>2+</sup> in hippocampal neurons.** Representative confocal images showing co-staining of FluoZin3 with LysoTracker (top) or with MitoTracker (bottom) in wild-type hippocampal neurons. Scale bar is 10  $\mu$ m. Similar results were observed in 3 or more independent experiments each examining 10-15 neurons.

**Fig. 5 A $\beta$ <sub>42</sub> induces TRPM2-dependent lysosomal dysfunction in hippocampal neurons.** (a) Representative images showing acridine orange (AO) staining of wild-type (WT) hippocampal neurons under control (CTL) conditions and after exposure to 100 nM bafilomycin for 15 min, or 1  $\mu$ M A $\beta$ <sub>42</sub> for 48 and 96 hr. (b) Representative images AO staining of TRPM2-KO hippocampal neurons under CTL and after exposure to 1  $\mu$ M A $\beta$ <sub>42</sub> for 48 and 96 hr. (c) Summary of the mean percentage of AO intensity under indicated conditions from 3 independent experiments, with each experiment examining 60-80 neurons. \*,  $p < 0.05$  indicates significant difference from CTL. Scale bar is 10  $\mu$ m (a, b).

**Fig. 6 A $\beta$ <sub>42</sub> induces cytochrome-C release in hippocampal neurons.** (a) Representative images showing cytochrome-c (Cyt-c) and DAPI staining of wild-type (WT) hippocampal neurons under control (CTL) conditions and after exposure to 1  $\mu$ M A $\beta$ <sub>42</sub> for 24 and 48 hr. Scale bar is 10  $\mu$ m. (b) Summary of the mean percentage of Cyt-c fluorescence intensity under indicated conditions from 2 independent experiments, with each experiment examining 30-45 neurons. \*\*,  $p < 0.01$ ; and \*\*\*,  $p < 0.001$  indicate significant difference from CTL.

**Fig. 7 A $\beta$ <sub>42</sub> induces TRPM2-dependent loss of mitochondrial function, and change in the mitochondrial morphology.** Representative confocal images from Fig. 3a are presented in large size to show MitoTracker Green staining of wild-type (WT) and TRPM2-KO hippocampal neurons under control (CTL) conditions and after exposure to 1  $\mu$ M A $\beta$ <sub>42</sub> for 24 and 48 hr.

**Fig. 8 A $\beta$ <sub>42</sub> induces TRPM2-dependent change in mitochondrial morphology in hippocampal neurons.** Computer-assisted analysis of the aspect ratio and form factor of mitochondria in wild-type (WT) (a) or TRPM2-KO hippocampal neurons (b) under control (CTL) conditions (black close rectangle) exposed to 1  $\mu$ M A $\beta$ <sub>42</sub> for 24 hr (red close circle) or 48 hr (blue close triangle), or in WT hippocampal neurons after exposure to 1  $\mu$ M A $\beta$ <sub>42</sub> for 48 hr (red close circle) without (black close rectangle) or with treatment with 1  $\mu$ M PJ34 (c), 10  $\mu$ M 2-APB (d) or 100 nM TPEN (e), prior to and during exposure to A $\beta$ <sub>42</sub>.

**Fig. 9 Bafilomycin induces TRPM2-dependent increase in the [Zn<sup>2+</sup>]<sub>c</sub> in hippocampal neurons.** (a) Representative images showing FluoZin3 staining of wild-type (WT) and TRPM2-KO hippocampal neurons under control (CTL) conditions and after exposure to 100 nM bafilomycin (Baf) for 30 min. Scale bar is 10  $\mu$ m. (b) Summary of the mean percentage

of FluoZin3 intensity under indicated conditions from 40-60 neurons. \*\*\*,  $p < 0.001$  indicate significant difference from CTL. NS, no significant difference.

**Fig. 10 Expression of TRPM2 protein in mitochondria.** (a) Representative confocal images showing TRPM2 immunostaining (green) and MitoTracker (red) in wild-type hippocampal neurons. Scale bar is 10  $\mu\text{m}$ . (b) Summary of the mean Pearson's correlation coefficient from 3 independent experiments, with each experiment examining 10-15 neurons. (c) Representative western blot showing the TRPM2 expression in mitochondria isolated from blank HEK293 (HEK293), HEK293 overexpressing human TRPM2 (hTRPM2-HEK293), and mouse hippocampal and cortex. Note that mitochondrial preparations showed positive expression of cytochrome-c (Cyt-c) but the negative expression of lysosome-associated membrane protein 1 (LAMP-1) protein. Similar observations were observed in three independent experiments.

**Fig. 11 PKC and NOX inhibitors prevent on  $\text{A}\beta_{42}$ -induced change in mitochondrial morphology in hippocampal neurons.** Computer-assisted analysis of the aspect ratio and form factor of mitochondria in wild-type hippocampal neurons after exposed to 1  $\mu\text{M}$   $\text{A}\beta_{42}$  for 48 hr without (black close circle) or with treatment with 10 nM Gö6976 (Go) (a, grey open rectangle), 10  $\mu\text{M}$  apocynin (Apo) (b, yellow rectangle) or 10  $\mu\text{M}$  GKT137831 (GKT) (c, green rectangle), 30 min prior to and during exposure to  $\text{A}\beta_{42}$ .

**Fig. 12  $\text{A}\beta_{42}$  induces no change in the  $[\text{Ca}^{2+}]_c$  in hippocampal neurons.** (a) Representative confocal images showing Fluo4 staining (green) of wild-type hippocampal neurons under control (CTL) conditions or after exposure to 1  $\mu\text{M}$   $\text{A}\beta_{42}$  for 24 or 48 hr, or 5  $\mu\text{M}$  ionomycin for 5 min. Scale bar is 10  $\mu\text{m}$ . (b) Summary of the mean Fluo4 intensity under indicated conditions. NS, no significant difference.

# Supplementary Fig. 1

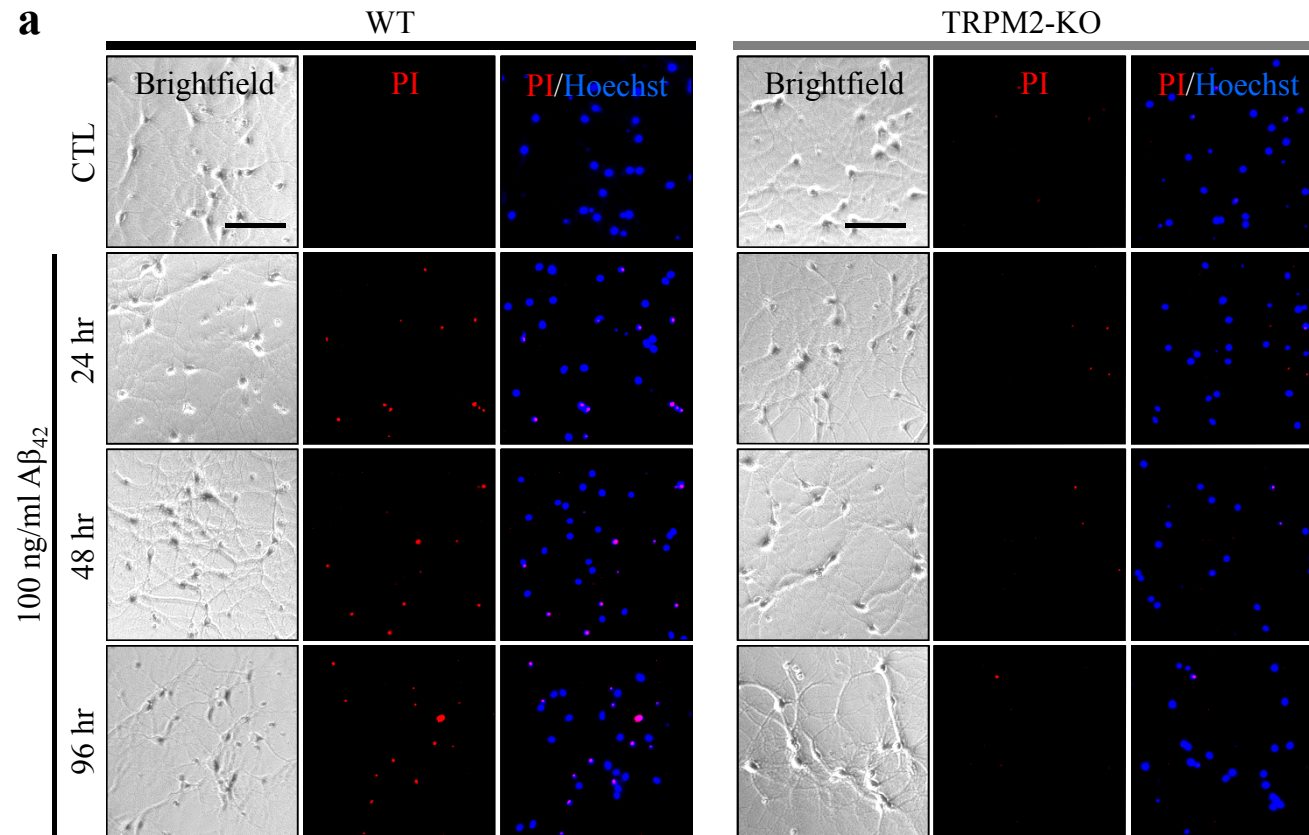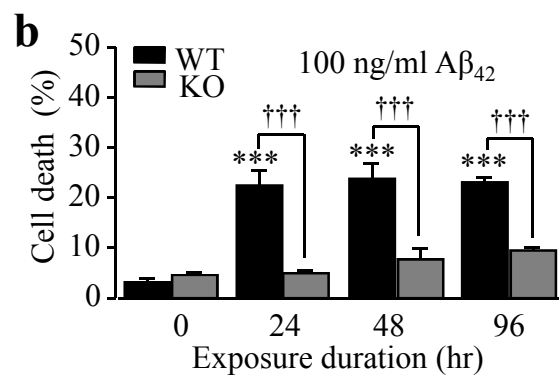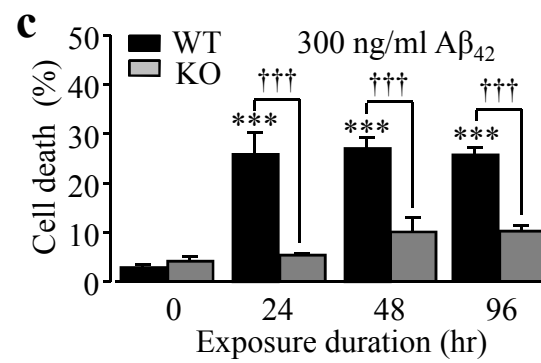

## Supplementary Fig. 2

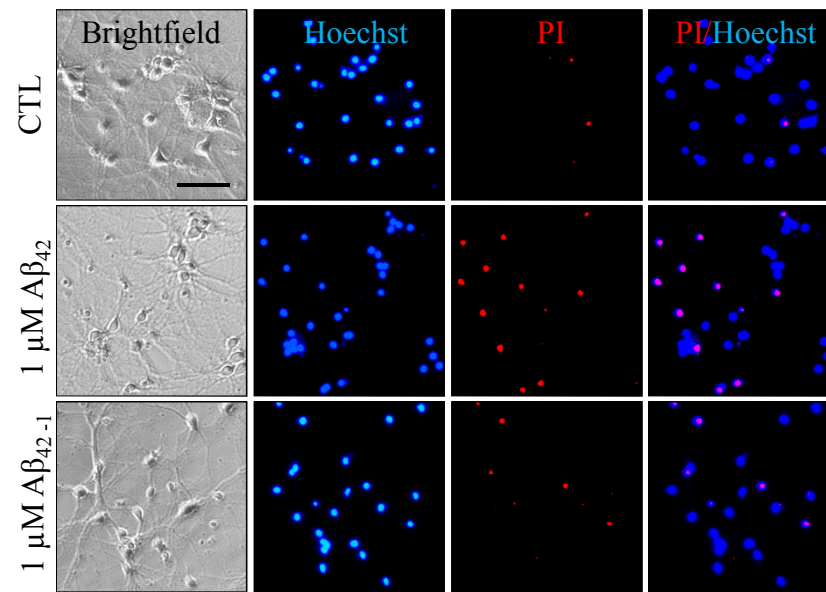

## Supplementary Fig. 3

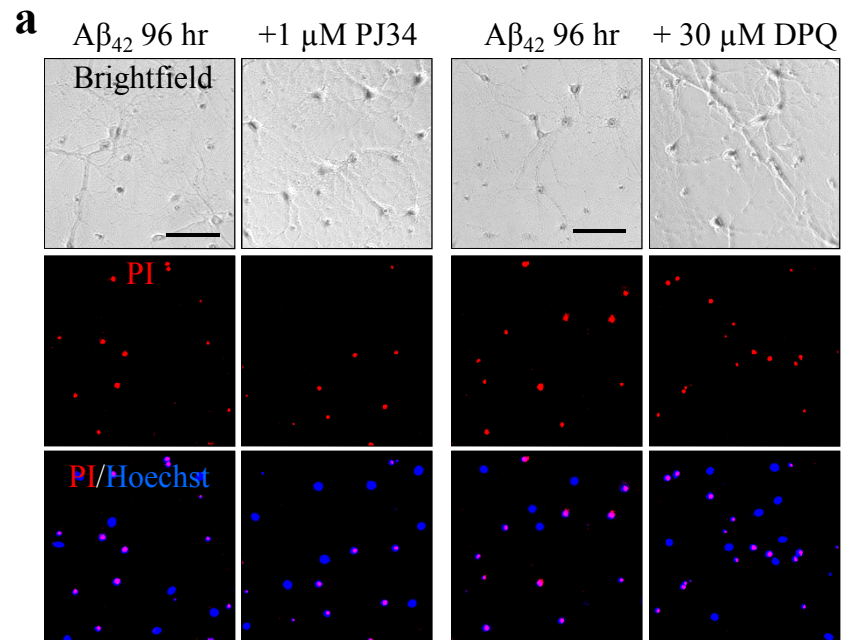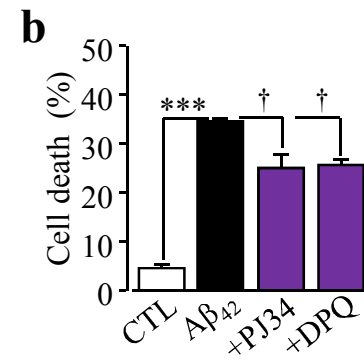

## Supplementary Fig. 4

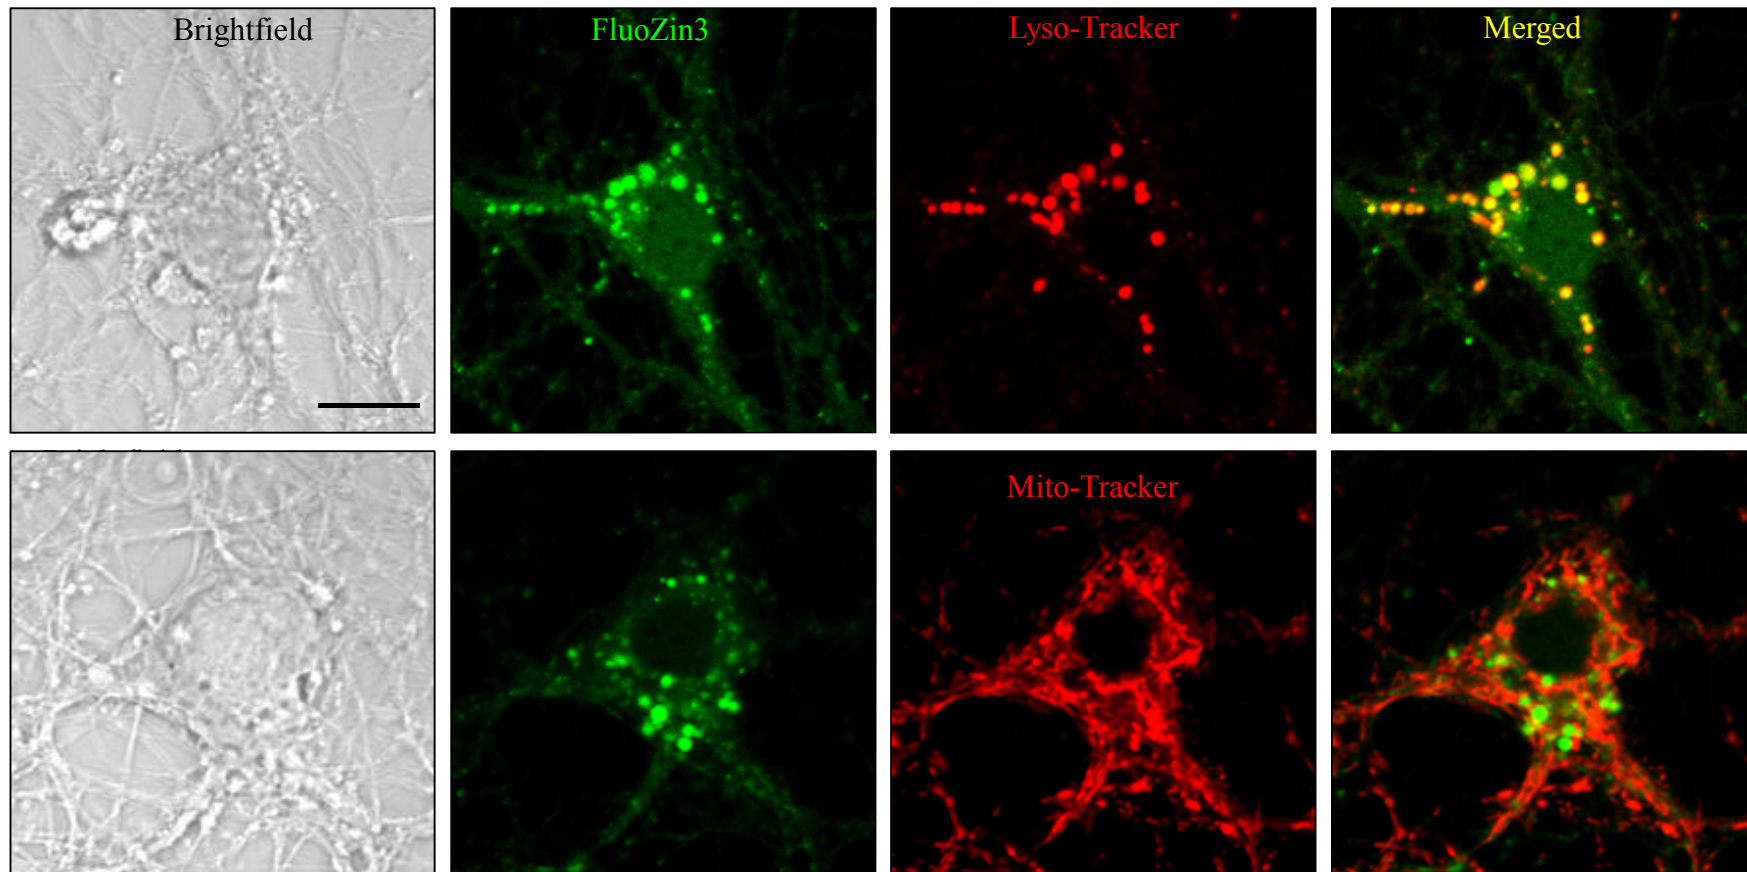

## Supplementary Fig. 5

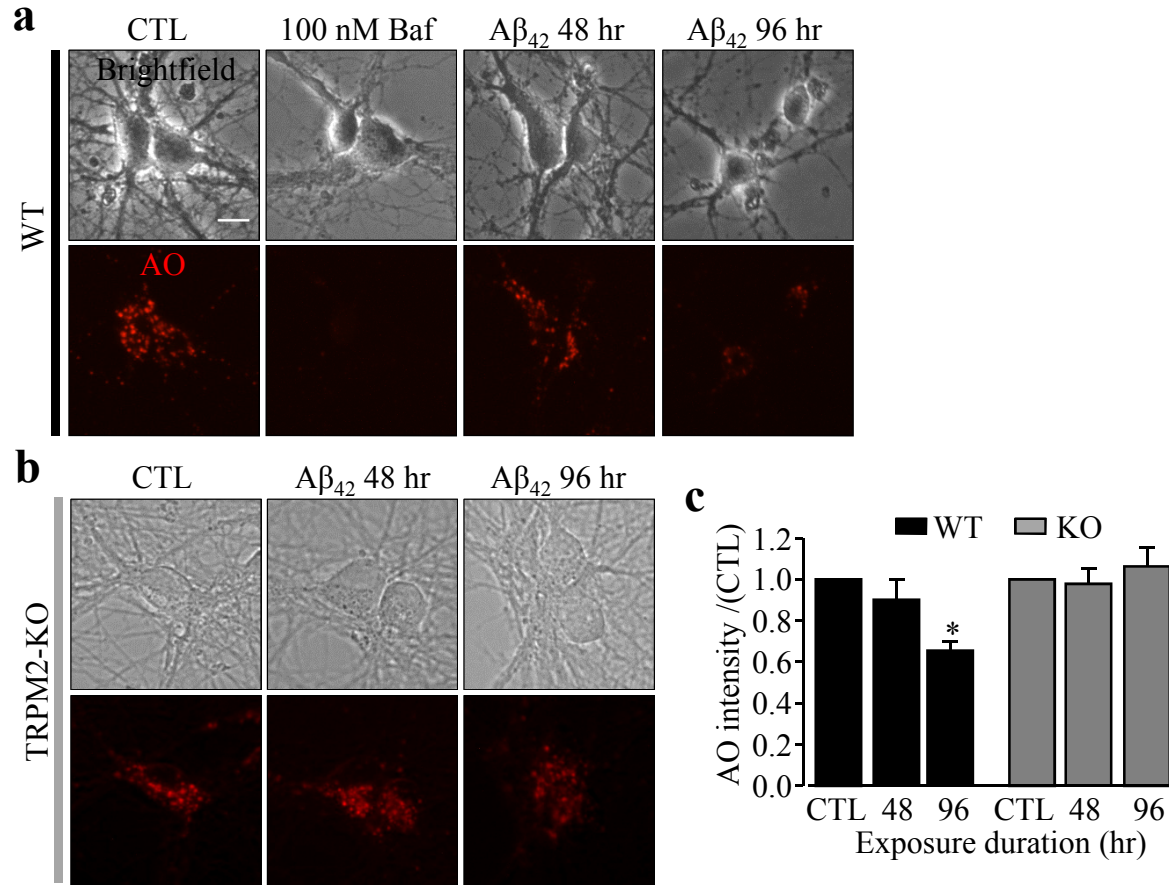



# Supplementary Fig. 6

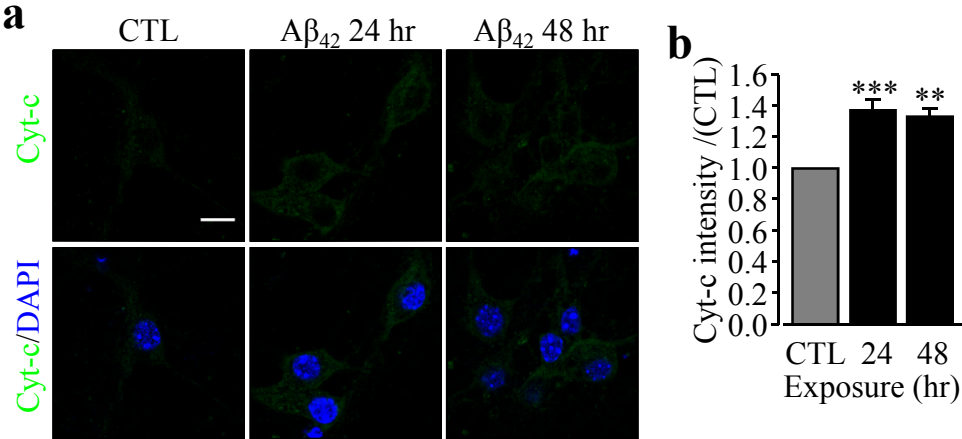

# Supplementary Fig. 7

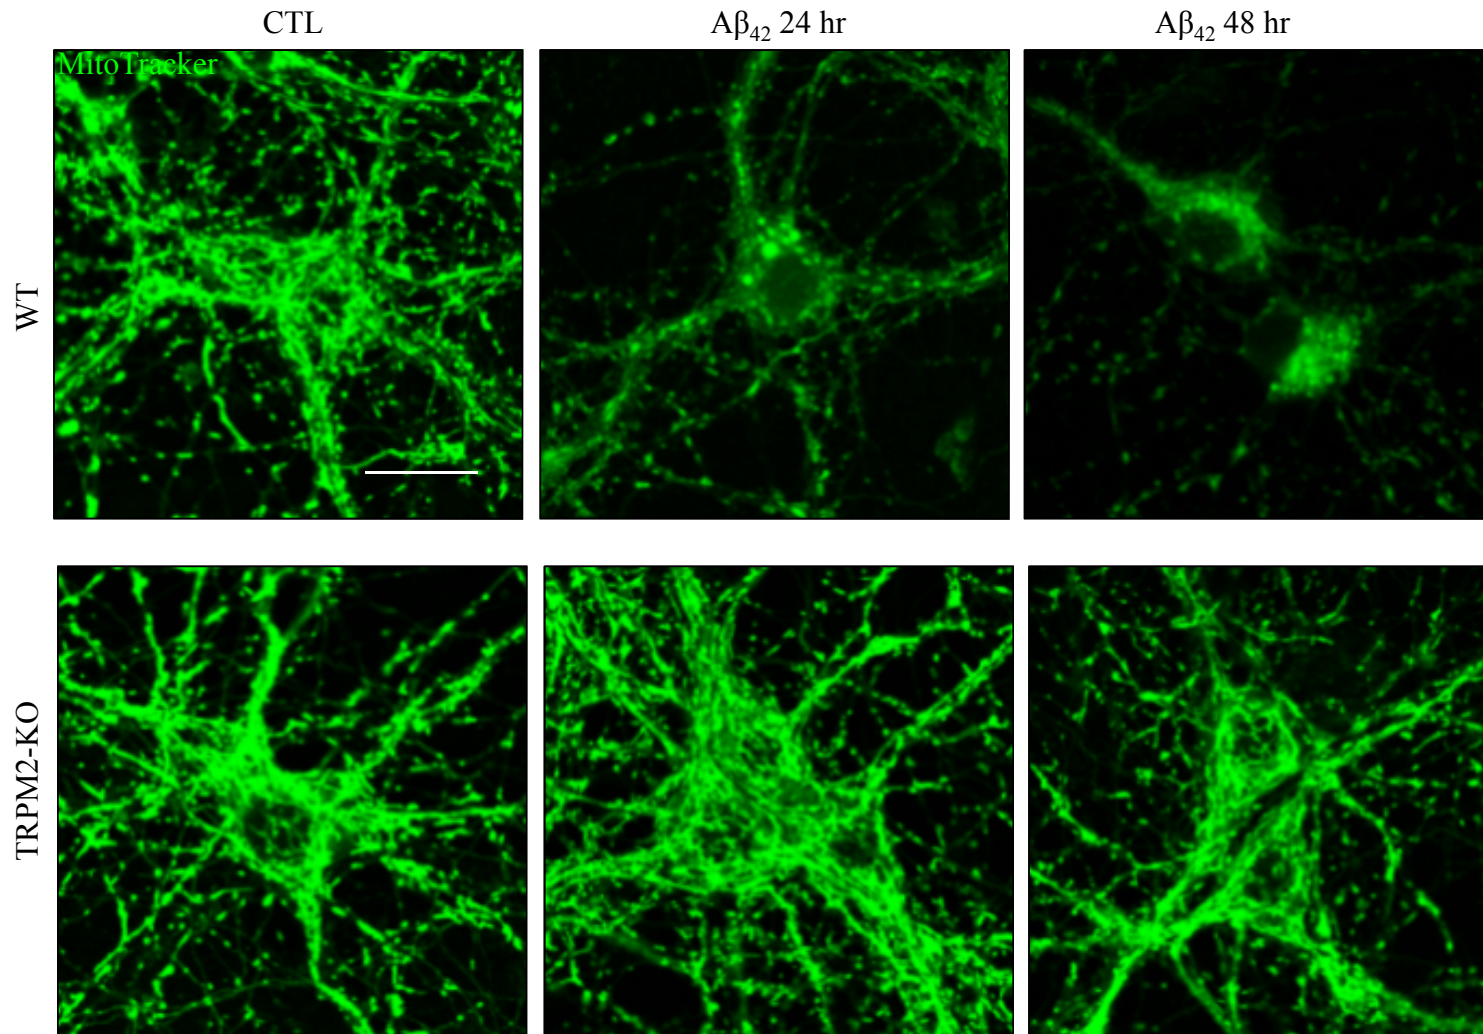

## Supplementary Fig. 8

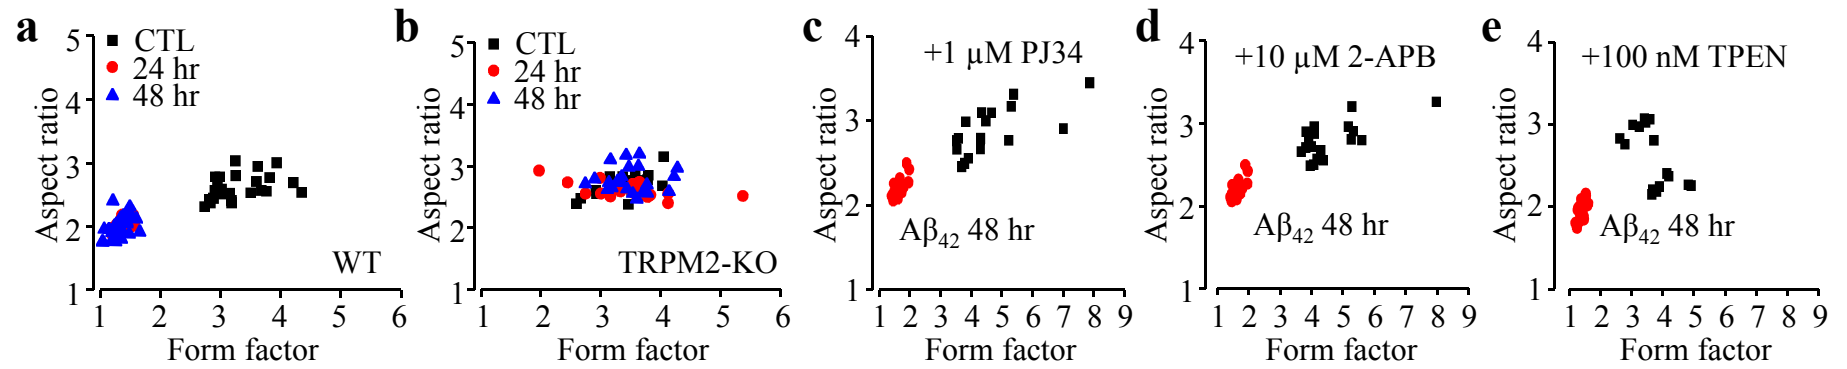

## Supplementary Fig. 9

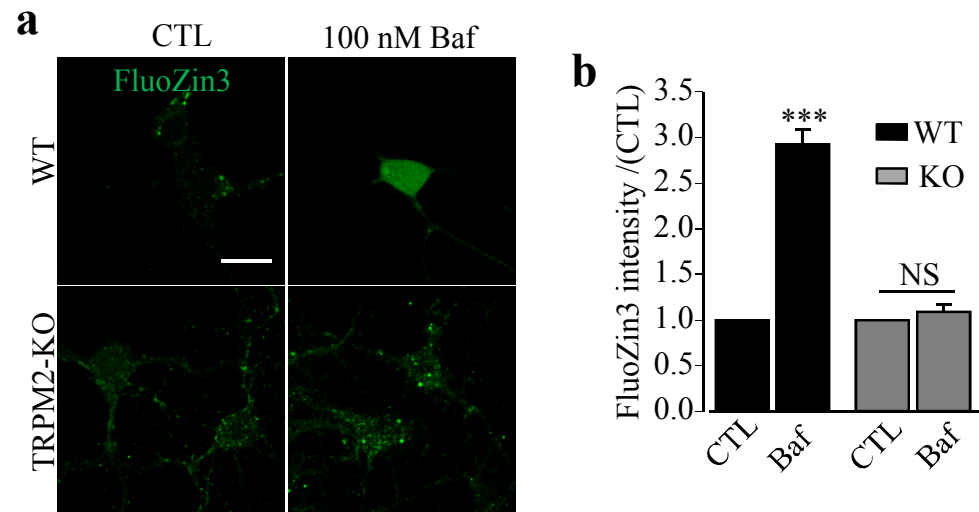

## Supplementary Fig. 10

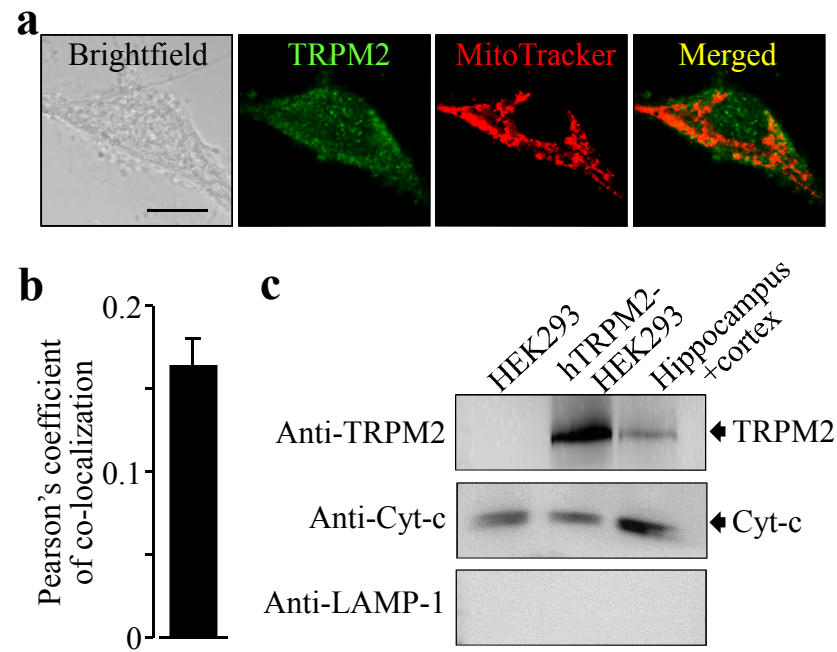

## Supplementary Fig. 11

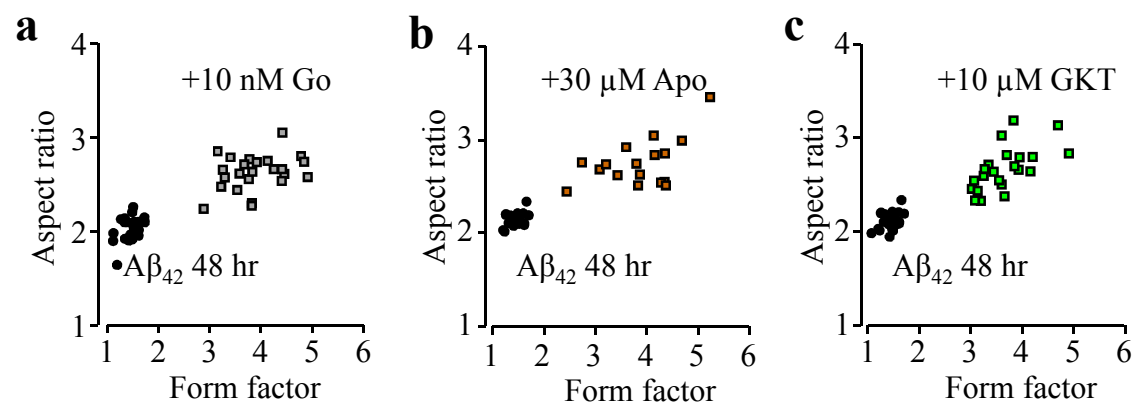

# Supplementary Fig. 12

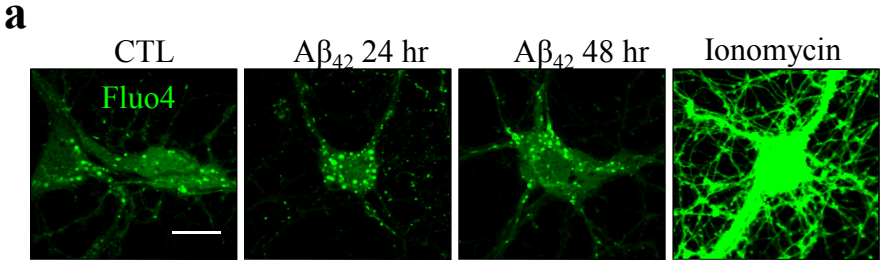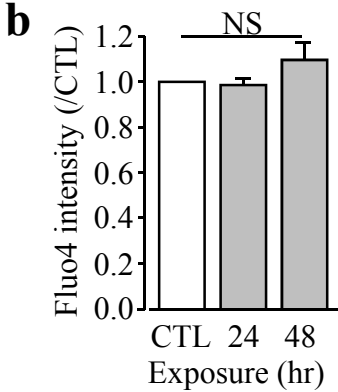

Supplement: 41419_2018_270_MOESM1_ESM.pdf [file 41419_2018_270_MOESM1_ESM.pdf]
